# Supplementary material
Source: MDPI journal article supplement (https://www.mdpi.com/1660-3397/5/4/180)
Supplement: s1 [file s1]

Correction

## Correction: Banack, S.A. *et al.* Production of the Neurotoxin BMAA by a Marine Cyanobacterium. *Mar. Drugs* 2007, 5, 180–196

Sandra Anne Banack and Paul Alan Cox \*

Institute for Ethnomedicine, Jackson, WY 83001, USA; E-Mail: sandra@ethnomedicine.org

\* Author to whom correspondence should be addressed; E-Mail: paul@ethnomedicine.org.

Received: 29 June 2010 / Published: 29 June 2010

---

We found an error in our paper published in *Marine Drugs* [1], in Figure 1, on page 181. The figure showed an incorrect structure for BMAA. A correct structure is provided here (Figure 1). The conclusions of the article remain unchanged.

Figure 1. BMAA.

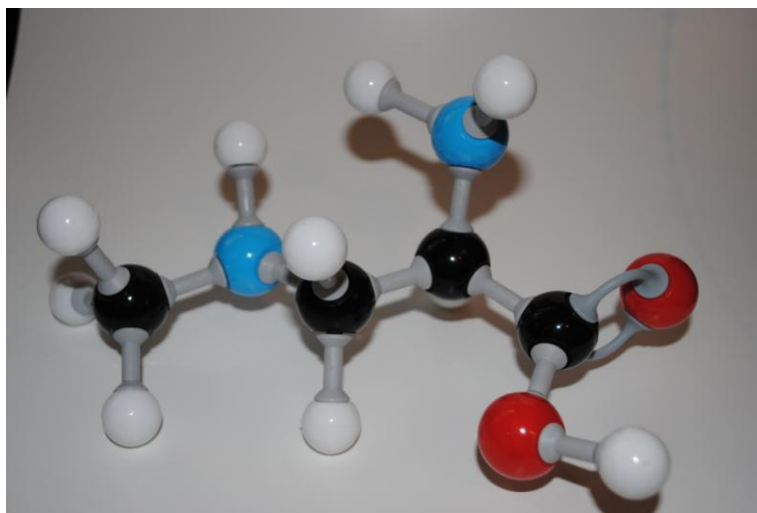

### Reference

1. Banack, S.A.; Johnson, H.E.; Cheng, R.; Cox, P.A. Production of the Neurotoxin BMAA by a Marine Cyanobacterium. *Mar. Drugs* 2007, 5, 180–196.
